# Supplementary material
Source: publisher figshare collection journal article supplement (https://wellcome.figshare.com/articles/dataset/_/7309163)
Supplement: Supplementary file 1 [file 2]

## Sheet: Survey Questions & Set-up
	This web-based survey was conducted by Wellcome as a key part of its review of PhD training and has helped inform our future strategy, including decisions on whether to continue our investment in PhD training and the shape of said investment. The survey was hosted by Qualtrics and contained a combination of qualitative and quantitative questions. It was designed to be answered by anyone, irrespec…
QUESTIONS
Q1.3	Do you have a PhD or are you currently undertaking a PhD?
Q1.4	Are you undertaking your PhD full-time or part-time?
Q1.5	Are you engaged in research?
Q1.6-9	Which of the following best describes your current occupation? - Selected Choice
Q1.10	Are you a potential employer of PhD graduates?
Q1.11	Have you supervised PhD students in the last 10 years?
Q1.12	Are you a clinician or currently undertaking a combined MB/PhD or MD/PhD degree?
Q1.13	What is your clinical specialty?
Q1.14	Where are you based? - Selected Choice
Q1.141	Which academic institution are you currently based at?
Q1.15	Did you undertake the majority of your PhD training in the UK?
Q1.16	At which institution are you undertaking/did you undertake your PhD training?
Q1.17	When did you complete your PhD?
Q1.18	In which discipline are you undertaking/did you undertake your PhD? - Selected Choice
Q1.19	Which of the following best describes the area within Biological/Biomedical Sciences you are undertaking/undertook your PhD in? - Selected Choice
Q1.20-21	What is/was the funding source of your PhD? - Selected Choice
Q1.22	What is/was the funded length of your PhD? - Selected Choice
Q1.23-26	In which year of your PhD are you? - Selected Choice
Q1.27	Did you have a Master's degree prior to starting your PhD training?
Q1.28	Was your Master's degree in the same discipline as your PhD?
Q1.29	In what discipline was your Master's degree? - Selected Choice
Q1.30	Were you/will you be awarded a Master's degree as part of the training offered by your PhD training?
Q1.31	Of the following, which is the highest level of academic attainment that you currently have? - Selected Choice
Q1.32 - Wellcome	Are you familiar with the Wellcome Trust and our investment in PhD training?
Q2.1 - Clinical	Of the following, which do you think is a better source of funding for PhD Training Fellowships for clinicians?
Q2.2 - Clinical	Please explain why you think this is a better funding source. (text box will expand if required)
Q2.3 - Clinical	In your view, are there specific clinical specialties in which more clinical PhDs should be trained?
Q2.4 - Clinical	If yes, in which clinical specialties should more PhDs be trained?
Q2.5 - Clinical	After the completion of your PhD do you plan to continue on a clinical academic path?
Q2.6 - Clinical	Why are you leaving or considering leaving the clinical academic path? (text box will expand if required)
Q2.7 - Clinical	What would you would like to do outside of academia? (text box will expand if required)
Q2.8 - Clinical	Why did you choose to not pursue a clinical academic career? (text box will expand if required)
Q3.2	In your view, what is the primary purpose of PhD training? - Selected Choice
Q3.3	Based on your view of the purpose of PhD training, what is your opinion on the number of PhD students currently being trained in the UK for that purpose?
Q3.4	Based on your view of the purpose of PhD training, what is your opinion on the number of PhD students currently being trained worldwide for that purpose?
Q3.5	Are PhDs obtained from Universities in the UK competitive with PhDs from other countries in Western Europe, Australia, Canada and the USA?
Q3.6	Why do you think this is the case? (text box will expand if required)
Q3.7	In your view, how important are the following for a PhD student to have by the time they finish their PhD training? - The ability to use evidence to back up a position in a compelling way, The ability to think critically, originally and creatively, The ability to be a clear and confident science communicator, The ability to independently identify and develop new research questions, Expert knowled…
Q3.8	Considering that most PhD students will not continue in academic research, do you and/or your institution actively encourage students to explore careers outside of academic research?
Q3.9	What types of activities do you encourage students to pursue in order to explore careers outside of academic research and what type of support do you provide? (text box will expand if required)
Q3.10	Considering that most PhD students will not continue in academic research, does your supervisor and/or institution actively encourage and support students to explore careers outside of academic research?
Q3.11	What types of activities are students encouraged to pursue in order to explore careers outside of academic research and what type of support do students receive? (text box will expand if required)
Q4.1	Do you consider that length of time to be normally sufficient to achieve the following? - Equip trainees with the necessary research skills to progress in research, Equip trainees with the necessary skills to work outside of academia, Allow the student to publish a first author paper, Complete an internship lasting 3 months, To complete a suitable original PhD research project
Q4.2	Do you think the average length of time to complete the research project for a PhD in the UK should change? - Selected Choice
Q4.3	What length should it be? (text box will expand if required)
Q4.4	Thinking back to when you undertook your PhD, did you spend additional time in the same academic group working on the same project(s) after the submission of your thesis and prior to moving onto your next post?
Q4.5	Please tell us for how long and in what capacity. (text box will expand if required)
Q5.1	At the end of the period of PhD training (e.g., end of the studentship funding), how do you assess whether the training of a student has been effective? (Please select all that apply) - Selected Choice
Q5.2	What are the main challenges you face or have faced as a supervisor of PhD students? (text box will expand if needed)
Q5.3	If applicable, what are the main challenges you face as a university administrator with regards to PhD training? (text box will expand if required)
Q5.4	What is your opinion on the level of bureaucracy that exists around PhD funding and management? This could refer to funder, institutional or government related administrative requirements. Please specify which you are referring to and, if possible, suggest potential measures to address the situation. (text box will expand if required)
Q5.5	If you could change one thing about the way that PhD students are currently trained, what would that be? (text box will expand if required)
Q6.2	In which areas could support for PhD students by either the institution or the supervisor be improved? Please select all that apply. - Selected Choice
Q6.3	Are there any areas in which institutional support for PhD supervisors could be improved? If yes, please describe.
Q6.4	In your experience, have you noticed any recent changes in the number of cases of mental health issues in PhD students?
Q6.5	What kind of support would be useful to address this? (text box will expand if required)
Q6.6	To what extent do you agree with the following statements. If you are unsure of the answer, please choose the "neither agree nor disagree" option. - My institution values diversity and recognises the benefits of having a diverse research student population, My institution provides equal support to all PhD students during their studies and My institution provides equal support to all PhD students …
Q6.7	If you have any additional comments about the support offered to PhD students that you would like us to know, please use the text box below. (text box will expand if required).
Q6.9	What motivated you to undertake a PhD? Please select the primary reason. - Selected Choice
Q6.10	Outside of your research project, what is/was the main challenge of your PhD training? (text box will expand if required)
Q6.11	Were the rotations useful?
Q6.12	Would you like to comment on your answer? (text box will expand if required)
Q6.13	As a PhD Student, how satisfied are you/were you with your work-life balance?
Q6.14	What kind of support would be useful to improve your work-life balance? (text box will expand if required)
Q6.15	Is there anything you wish you had known regarding the expectations from PhD students, requirements of PhD training, career prospects of PhD students, and/or life as a PhD student before you started your PhD training? If yes, please describe.
Q6.16	Have you experienced discrimination or unfavourable treatment on the basis of any of the following categories? Please select all that apply. - Gender, Sexual Orientation, Ethnicity or race, Religion and belief, Disability, Soci-economic background, Other.
Q7.2	How important do you consider the following attributes to be for prospective PhD students? - Relative expertise in PhD topic area, Non-research work experience, Research experience, Passion and enthusiasm, High grades, A Master's degree
Q7.3	Are there any other attributes you consider important for prospective PhD students? If yes, please describe.
Q7.4	What is the ideal amount of research experience you think a prospective PhD student in your discipline should normally have? - Selected Choice
Q7.5	How important do you consider the following to be when identifying the best prospective PhD students? - Cover letter or Personal Statement, CV, Degree class/grades, Letters of recommendation, Previous research experience, Publications, Interview
Q7.6	Are there any particular qualities or aptitudes you look for in order to identify the best prospective PhD students? If yes, please describe.
Q7.7	Prior to undertaking your PhD, how much research experience did you have? - Selected Choice
Q7.8 Clinical	What type of research experience did you have before undertaking a PhD? Please select all that apply. - Selected Choice
Q7.9	Are you considering undertaking a PhD?
Q7.10	In which subject area would you consider doing a PhD? - Selected Choice
Q7.11	Do you feel you currently have the skills and experience necessary to become a successful applicant for a PhD studentship?
Q7.12	Please describe what skills/experience you feel you may need to gain. (text box will expand if required)
Q7.13	What motivates you to consider undertaking a PhD? Please select the primary reason. - Selected Choice
Q8.2	Do you know what you would like to do after your PhD? - Selected Choice
Q8.3	Do you feel sufficiently supported to do this? If no, please describe how you could be better supported. - Selected Choice
Q8.4	You previously indicated that you would like to pursue an academic research career. Why have you changed your mind?
Q8.5	What was your first job after completing your PhD? - Selected Choice
Q8.6	What was your motivation for changing to a non-research career? (text box will expand if required)
Q8.7	Has your PhD training been essential to your roles since you left research? - Selected Choice
Q9.2	How important do you think the following attributes are to employers outside of the academic sector when recruiting PhD qualified staff? - Ability to think critically and problem solve; Capacity and ability to work autonomously, Specialist knowledge
Q9.3	Are there any other attributes you think are important to employers outside of the academic sector when recruiting PhD qualified staff? If yes, please describe.
Q9.4	How important are the following attributes when recruiting PhD qualified staff in your industry? - Ability to think critically and problem solve; Capacity to work autonomously, Specialist knowledge
Q9.5	Are there any additional attributes you think are important when recruiting PhD qualified staff in your industry? If yes, please describe.
Q9.6	Should PhD training incorporate additional training to target key skills shortages in the workforce?
Q9.7	Why do you think this? (text box will expand if required)
Q9.8	How do you/did you find the number of training courses/modules that students are required to attend during their PhD training?
Q9.9	How important is it for students to acquire the following skills? - Commercial acumen, translational and entrepreneurial skills, Data, statistical and analytical skills, Leadership skills, Presentation and communication skills, problem solving skills, project management, public engagement, team working, time management
Q9.10	As a potential employer of PhD graduates, are there any skills you feel they often lack? Please select all that apply. - Selected Choice
Q9.11	Is there any additional training that you think you would benefit from/would have benefited from during your PhD training? (text box will expand if required)
Q10.2 Wellcome	What do you think should be Wellcome's role in PhD training? (text box will expand if required)
Q10.3 Wellcome	What can Wellcome do to improve PhD training? (text box will expand if required)
Q10.4 Wellcome	Are Wellcome PhD students different in any way (prior, during or after their PhD training) to non-Wellcome funded students? (text box will expand if required)
Q10.5 Wellcome	Should Wellcome continue to invest in PhD training?
Q10.6 Wellcome	If you would like to comment on your answer, please use this text box. (text box will expand if required)
Q10.7 Wellcome	Are there any additional areas or issues you think we should be considering in our review of PhD training? (if yes, please describe)
Q11.2	Which of the following best describes your gender?
Q11.3	What is your current age?
Q11.4	Do you have any caring responsibilities? If yes please select all that apply.

## Sheet: Demographics
Survey respondents - Demographics - General
Total number completed submissions	2703
Have a PhD	1440
Do not have a PhD	1263
Currently undertaking a PhD	924
Full-time	854
Part-time	70
Respondents not currently undertaking a PhD	Have PhD	Do not have PhD	Total
Yes, I am undertaking research in the academic sector	1188	152	1340
I am a postdoctoral researcher	275	3	278
I am a research group leader	722	30	752
I am a staff scientist	67	21	88
Other (please describe)	124	98	222
Professors/Readers/Lecturers/Fellows			45
Clinical Academics			31
Directors of Institutes/Rsch/Graduate Studies			17
Undergraduate and Master's students			19
Postdocs/Rsch Technicians/Lab Managers			6
Yes, I am undertaking research outside of the academic sector	58	38	96
I conduct research in a clinical, non-academic setting	10	10	20
I conduct research in Industry (Biotech/Pharma/Medtech)	26	4	30
Other (please describe)	22	24	46
No, I am not currently undertaking research	194	149	343
University administrator	34	40	74
Clinician (including all health professions)	7	24	31
Other (please describe)	153	85	238
Wellcome employees/grant funding bodies/research charity			40
Geographic Location of Respondents	Have PhD	Do not have PhD	Total
UK	1215	1020	2235
Europe (non UK)	84	62	146
US/Canada	57	38	95
Africa	22	59	81
Asia	21	32	53
Other (please state)	17	28	45
Oceania	17	12	29
Central and South America and the Caribbean	7	12	19
Respondents' Year of PhD completion
1970 or earlier	5
1971-1975	9
1976-1980	35
1981-1985	62
1986-1990	92
1991-1995	122
1996-2000	196
2001-2005	228
2006-2010	260
2011-2014	209
Within the last three years	222
Grand Total	1440
Respondents' current age
18-21	22
22-30	940
31-40	800
41-50	476
51-60	306
61-65	72
66-70	27
71+	8
Prefer not to say	52
Grand Total	2703
Gender	Have PhD	Do not have PhD	Total
Female	710	806	1516
Male	688	413	1101
Prefer not to say	36	31	67
Prefer to self-describe:	6	13	19
Disciplines in which respondents are undertaking or have undertaken their PhDs
	PhD Student	Have PhD	Total
Biological/Biomedical Sciences	683	1087	1770
Arts/Humanities/Social Sciences	80	105	185
Population/Public Health	74	88	162
Physical Sciences (including Chemistry and Physics)	44	91	135
Engineering	4	30	34
Computer Science	14	16	30
Mathematics	10	8	18
Other	14	14	28
Total	923	1439	2362
Areas within Biological/Biomedical Sciences respondents are undertaking/undertook your PhD in
	PhD Student	Have PhD	Total
Molecular biology, biophysics and biochemistry	118	229	347
Neuroscience	118	198	316
Cell and developmental biology	95	195	290
Genetics	55	111	166
Parasitology, virology and infectious disease	61	82	143
Immunology	48	68	116
Anatomy, pathology and physiology	22	55	77
Other	67	82	149
Total	584	1020	1604
Funded Length of Current PhD Students
3 years	318
3.5 years	36
4 years without rotations	126
4 years, including rotations	277
Other	24
total	781
Did you have a Master's degree prior to starting your PhD training?
Yes	1245
No	1119
Was your Master's degree in the same discipline as your PhD?
Yes	962
No	283
Were you/will you be awarded a Master's degree as part of the training offered by your PhD training?
	PhD Student	Have PhD
Yes	142	151
No	782	1289
Funding Source of PhD (if PhD in Biological/Biomedical Sciences and Public Health)	PhD Student	Have PhD	Total
Wellcome Trust	280	169	449
Other	152	294	446
University	94	140	234
Medical Research Council (MRC)	76	210	286
Biotechnology and Biological Sciences Research Council (BBSRC)	34	99	133
Engineering and Physical Sciences Research Council (EPSRC)	28	58	86
Self-Funded	19	38	57
National Institute for Health Research (NIHR)	17	12	29
Cancer Research UK (CRUK)	9	31	40
British Heart Foundation (BHF)	7	9	16
Grand Total	716	1060	1776
Funding Source of PhD (if PhD in Biological/Biomedical Sciences); if currently a PhD student, the length of PhD	PhD Student	Have PhD	Total
Biotechnology and Biological Sciences Research Council (BBSRC)	34	99	133
3 years	1		1
4 years without rotations	16		16
4 years, including 1 year for rotations	13		13
Other (please state)	4		4
British Heart Foundation (BHF)	7	9	16
3 years	2		2
4 years, including 1 year for rotations	4		4
Other (please state)	1		1
Cancer Research UK (CRUK)	9	31	40
3 years	5		5
4 years without rotations	4		4
Engineering and Physical Sciences Research Council (EPSRC)	28	58	86
3 years	8		8
4 years without rotations	9		9
4 years, including 1 year for rotations	2		2
Other (please state)	9		9
Medical Research Council (MRC)	76	210	286
3 years	16		16
4 years without rotations	17		17
4 years, including 1 year for rotations	23		23
Other (please state)	20		20
National Institute for Health Research (NIHR)	17	12	29
3 years	13		13
4 years without rotations	2		2
Other (please state)	2		2
Other (please state)	152	294	446
3 years	94		94
4 years without rotations	23		23
4 years, including 1 year for rotations	11		11
Other (please state)	24		24
Self-Funded	19	38	57
3 years	9		9
4 years without rotations	4		4
Other (please state)	6		6
University	94	140	234
3 years	61		61
4 years without rotations	17		17
4 years, including 1 year for rotations	4		4
Other (please state)	12		12
Wellcome Trust	280	169	449
3 years	50		50
4 years without rotations	4		4
4 years, including 1 year for rotations	213		213
Other (please state)	13		13
Total	716	1060	1776

## Sheet: Wellcome-specific
Are you familiar with the Wellcome Trust and our investment in PhD training?
Yes	2212
No	491
Of those who answered 'Yes', we asked 'Should Wellcome continue to invest in PhD training?'
Yes	2110
I am not sure	70
No	10

## Sheet: Purpose of PhD Training 
All Respondents
	In your view, what is the primary purpose of PhD training?
	To develop highly-skilled individuals who can contribute in a knowledge-based economy and meet changing skills needs in the workforce	1067
	To provide continued education in a specialty area	101
	To train the research leaders of the future	821
	To undertake a research project that has value in and of itself and for the individual	515
	Other (please describe)	181
	Grand Total	2685
Breakdown of all Respondents
		PhD Student	Research Group Leader (academic)	Postdoctoral Researcher (Academic)	Other (research in academic sector)	Staff Scientist (academic)	University Administrator	Researcher in Industry	Researcher in Clinical, non-academic setting	Other (research in non-academic setting)	Other (non-research active)	Clinician and other health professions, non-research active
	To develop highly-skilled individuals who can contribute in a knowledge-based economy and meet changing skills needs in the workforce	389	267	95	73	32	37	20	14	22	105	13
	To provide continued education in a specialty area	41	17	12	15	4	1	2		1	8
	To train the research leaders of the future	260	255	98	68	28	21	3	3	9	67	9
	To undertake a research project that has value in and of itself and for the individual	176	146	53	43	18	13	3	2	12	44	5
	Other (please describe)	52	64	17	22	5	1	2	1	2	12	3
Respondents in Biological and Biomedical Sciences including PH (PhD students and PhD qualified individuals only)
	In your view, what is the primary purpose of PhD training?
	To develop highly-skilled individuals who can contribute in a knowledge-based economy and meet changing skills needs in the workforce	757
	To provide continued education in a specialty area	59
	To train the research leaders of the future	623
	To undertake a research project that has value in and of itself and for the individual	348
	Other (please describe)	135
	Grand Total	1922
Breakdown of Respondents in Biological and Biomedical Sciences and Public Health
		PhD Student	Research Group Leader (academic)	Postdoctoral Researcher (Academic)	Staff Scientist (academic)	Other (research in academic sector)	University Administrator	Researcher in Industry	Researcher in Clinical, non-academic setting	Clinician and other health professions, non research active	Other (research in non-academic setting)	Other (non-research active)
	To develop highly-skilled individuals who can contribute in a knowledge-based economy and meet changing skills needs in the workforce	327	207	82	18	27	16	13	3	2	5	57
	To provide continued education in a specialty area	29	13	10	1	3						3
	To train the research leaders of the future	219	219	83	19	31	6	2	2	3	5	34
	To undertake a research project that has value in and of itself and for the individual	133	121	42	10	11	2	3	1		1	24
	Other (please describe)	44	48	15	5	10		1	1	1		10
Respondents from disciplines OTHER than Biological and Biomedical Sciences and Public Health (PhD students and PhD qualified individuals only)
	In your view, what is the primary purpose of PhD training?
	To develop highly-skilled individuals who can contribute in a knowledge-based economy and meet changing skills needs in the workforce	310
	To provide continued education in a specialty area	42
	To train the research leaders of the future	198
	To undertake a research project that has value in and of itself and for the individual	167
	Other (please describe)	46
	Grand Total	763
Breakdown of Respondents in disciplines other than Biological and Biomedical Sciences and Public Health
		PhD Student	Research Group Leader (academic)	Postdoctoral Researcher (Academic)	Staff Scientist (academic)	Other (research in academic sector)	University Administrator	Researcher in Industry	Researcher in Clinical, non-academic setting	Clinician and other health professions, non research active	Other (research in non-academic setting)	Other (non-research active)
	To develop highly-skilled individuals who can contribute in a knowledge-based economy and meet changing skills needs in the workforce	62	60	13	14	46	21	7	11	11	17	48
	To provide continued education in a specialty area	12	4	2	3	12	1	2			1	5
	To train the research leaders of the future	41	36	15	9	37	15	1	1	6	4	33
	To undertake a research project that has value in and of itself and for the individual	43	25	11	8	32	11		1	5	11	20
	Other (please describe)	8	16	2		12	1	1		2	2	2

## Sheet: Number of PhD Students
Based on your view on the primary purpose of PhD training, what is your opinion on the number of PhD students currently being trained in the UK for that purpose? (Respondents in the UK)
	PhD Student	No, I don't have a PhD	Yes, I have a PhD	Total
To develop highly-skilled individuals who can contribute in a knowledge-based economy and meet changing skills needs in the workforce	225	77	379	681
The number is about right	114	20	169	303
We are training too few	48	45	125	218
We are training too many	63	12	85	160
To provide continued education in a specialty area	25	8	25	58
The number is about right	11	3	11	25
We are training too few	4	3	5	12
We are training too many	10	2	9	21
To train the research leaders of the future	169	48	351	568
The number is about right	75	14	129	218
We are training too few	33	28	90	151
We are training too many	61	6	132	199
To undertake a research project that has value in and of itself and for the individual	95	29	200	324
The number is about right	42	9	86	137
We are training too few	23	16	51	90
We are training too many	30	4	63	97
Other	23	6	81	110
The number is about right	11	2	34	47
We are training too few	3	3	25	31
We are training too many	9	1	22	32
Based on your view of the purpose of PhD training, what is your opinion on the number of PhD students currently being trained worldwide for that purpose? (Respondents outside of the UK)
	PhD Student	No, I don't have a PhD	Yes, I have a PhD	Total
To develop highly-skilled individuals who can contribute in a knowledge-based economy and meet changing skills needs in the workforce	53	31	93	177
The number is right	15	4	27	46
We are training too few	22	22	24	68
We are training too many	16	5	42	63
To provide continued education in a specialty area	5	7	8	20
The number is right	2	4	2	8
We are training too few	3	1	3	7
We are training too many		2	3	5
To train the research leaders of the future	29	23	58	110
The number is right	7	4	15	26
We are training too few	11	12	12	35
We are training too many	11	7	31	49
To undertake a research project that has value in and of itself and for the individual	21	8	29	58
The number is right	5	1	12	18
We are training too few	7	5	6	18
We are training too many	9	2	11	22
Other	5	5	7	17
The number is right			2	2
We are training too few	2	4	3	9
We are training too many	3	1	2	6

## Sheet: Competitiveness of Training
Are PhDs obtained from Universities in the UK competitive with PhDs from other countries in Western Europe, Australia, Canada and the USA?
	PhD Student	No, I don't have a PhD	Yes, I have a PhD	Total
No	55	12	202	269
Yes	608	229	1077	1914

## Sheet: Time to Complete and Assessment
The average length of time to complete a research project for a PhD in the Biological and Biomedical Sciences in the UK is approximately 3 years. Do you consider that length of time to be normally sufficient to achieve the following?
Respondents: PhD students and PhD qualified individuals
	Equip trainees with the necessary research skills to progress in research	Equip trainees with the necessary skills to work outside of academia	Allow the student to publish a first author paper	Complete an internship lasting 3 months	To complete a suitable original PhD research project
Supervisors
Yes	397	318	297	122	324
No	273	289	366	501	335
I don't know	6	69	13	53	17
PhD Students
Yes	681	406	453	172	584
No	116	301	321	533	194
I don't know	50	140	72	142	68
Postdocs/Staff Scientists
Yes	245	139	150	81	195
No	66	133	157	188	111
I don't know	7	45	11	49	12
In your view, how important are the following for a PhD student to have by the time they finish their PhD training? (All respondents, except individuals from Arts, Humanities and Social Sciences)
	The ability to use evidence to back up a position in a compelling way	The ability to think critically, originally and creatively	The ability to be a clear and confident science communicator	The ability to independently identify and develop new research questions	Expert knowledge in their field	The ability to plan and carry out a research project
Essential	1977	1989	948	1053	1090	1706
PhD Student	654	644	355	390	325	578
No, I don't have a PhD	242	254	154	147	153	231
Yes, I have a PhD	1081	1091	439	516	612	897
Very important	475	497	1226	1179	1093	737
PhD Student	173	195	399	376	402	248
No, I don't have a PhD	80	75	143	154	134	95
Yes, I have a PhD	222	227	684	649	557	394
Somewhat important	56	28	328	274	321	69
PhD Student	21	7	88	77	116	20
No, I don't have a PhD	8	5	32	31	41	7
Yes, I have a PhD	27	16	208	166	164	42
Not important	6	4	11	12	14	5
PhD Student	1	1	4	5	4	1
No, I don't have a PhD	2	2	2	2	6	3
Yes, I have a PhD	3	1	5	5	4	1
I don't know	8	6	7	5	6	5
PhD Student	0	2	0	1	1	1
No, I don't have a PhD	6	2	6	3	4	2
Yes, I have a PhD	2	2	1	1	1	2
At the end of the period of PhD training (e.g., end of the studentship funding), how do you assess whether the training of a student has been effective? (Respondents: PhD supervisors only)
Successful completion of the thesis	518
Able to pursue the desired career route after completion	507
Publication of first author paper(s)	417
Other **	120
Unsure	3
** Answers under "Other"
All the above or combination of options listed	25
Independence	23
Student satisfaction	14
Publications	12
Ability to think critically/rigorously	11
Misc.	11
Ability to pursue chosen career	5
Scientific growth/development	5
Effective Communication	3
Do you think the average length of time to complete the research project for a PhD in the UK should change? (Respondents: PhD students, PhD qualified and University Administrators; all disciplines)
	Yes, it should be longer	It depends*	No, it shouldn't change	I don't know	Yes, it should be shorter
Research Group Leader (academic)	444	155	90	2
PhD Student	315	207	247	76	4
Postdoctoral Researcher (Academic)	114	62	71	10	1
Other (non-research active)	65	38	34	9
Other (research in academic sector)	38	35	22	2
Staff Scientist (academic)	35	11	12	3
University Administrator	35	15	10	7	2
Researcher in Industry	11	3	10	2
Researcher in Clinical, non-academic setting	6	2	1
Other (research in non-academic setting)	5	4	4	2
Clinician and other health professions, non research active	3	1	3
Total	1071	533	504	113	7
PhD Student	315	207	247	76	4
PhD Supervisor	435	153	87	3
*Open text comments advocate for flexibility given individual circunstances.
Do you think the average length of time to complete the research project for a PhD in the UK should change? (Respondents: PhD students, PhD qualified and University Administrators; Biological and Biomedical Sciences and Public Health only)
	Yes, it should be longer	It depends*	No, it shouldn't change	I don't know	Yes, it should be shorter
Research Group Leader (academic)	384	120	80	2
PhD Student	245	157	189	58	1
Postdoctoral Researcher (Academic)	93	52	58	7	1
Other (non-research active)	53	34	25	6
Other (research in academic sector)	32	22	15	2
Staff Scientist (academic)	28	9	10	3
University Administrator	14	5	3	1
Researcher in Industry	8	2	8	1
Researcher in Clinical, non-academic setting	5	2
Clinician and other health professions, non research active	3		3
Other (research in non-academic setting)		4	2	2
Total	865	407	393	82	2
PhD Student	245	157	189	58	1
PhD Supervisor	378	118	77	2
*Open text comments advocate for flexibility given individual circunstances.
If responded "Yes, it should be longer", What should that length be?
3.5 to 4 years	54
4 years	302
at least 4 years, up to 5	165
more than 5	7
Other	58
Thinking back to when you undertook your PhD, did you spend additional time in the same academic group working on the same project(s) after the submission of your thesis and prior to moving onto your next post?
No	776
Yes	661

## Sheet: Rotations and Master's
Were the rotations useful? (Respondents: current PhD students in 4 year programmes with a rotation component and have already completed their rotations)
Yes	203
No	11
Did you have a Master's degree prior to starting your PhD training? (PhD Students and PhD qualified individuals; if the latter, breakdown by year of PhD completion)
	PhD Student	Have PhD	Have PhD-Pecentage of total
Yes	603	642
1971-1975		2	0.222222
1976-1980		4	0.114286
1981-1985		13	0.209677
1986-1990		19	0.206522
1991-1995		29	0.237705
1996-2000		74	0.377551
2001-2005		102	0.447368
2006-2010		150	0.576923
2011-2014		113	0.54067
Within the last three years		136	0.612613
No	321	798
1970 or earlier		5	1
1971-1975		7	0.777778
1976-1980		31	0.885714
1981-1985		49	0.790323
1986-1990		73	0.793478
1991-1995		93	0.762295
1996-2000		122	0.622449
2001-2005		126	0.552632
2006-2010		110	0.423077
2011-2014		96	0.45933
Within the last three years		86	0.387387
Respondents' Year of PhD completion
1970 or earlier	5
1971-1975	9
1976-1980	35
1981-1985	62
1986-1990	92
1991-1995	122
1996-2000	196
2001-2005	228
2006-2010	260
2011-2014	209
Within the last three years	222
Grand Total	1440

## Sheet: Careers and Skills 
Considering that most PhD students will not continue in academic research, do you and/or your institution actively encourage students to explore careers outside of academic research? (Respondents: Individuals undertaking research in the academic sector and university administrators)
	Yes	No
Research Group Leader	587	97
Postdoctoral Researcher	142	76
Staff Scientist	52	17
Other (research in academic sector)	111	46
University Administrator	56	9
PhD Supervisor	552	92
(not all Group Leaders are supervisors)
Considering that most PhD students will not continue in academic research, does your supervisor and/or institution actively encourage and support students to explore careers outside of academic research? (Respondents: PhD students)
	PhD Student
Yes	402
No	327
How important do you think the following attributes are to employers outside of the academic sector when recruiting PhD qualified staff? (Respondents: PhD Students, individuals underaking research in Academic Institutions and University Administrators
	Ability to think critically and problem solve	Capacity and ability to work autonomously	Specialist knowledge
PhD Student	921	920	920
Essential	476	403	135
Very Important	374	393	268
Somewhat Important	42	90	372
Not Important	3	4	106
I don't know	26	30	39
Research Group Leader	750	749	747
Essential	450	363	56
Very Important	244	316	218
Somewhat Important	22	36	367
Not Important	1	0	66
I don't know	33	34	40
Postdoctoral Researcher	276	276	275
Essential	145	125	38
Very Important	96	108	57
Somewhat Important	11	21	123
Not Important	5	3	35
I don't know	19	19	22
Staff Scientist	87	87	87
Essential	56	40	14
Very Important	23	35	32
Somewhat Important	4	8	31
Not Important	0	0	5
I don't know	4	4	5
University Administrator	73	73	73
Essential	38	24	13
Very Important	32	44	17
Somewhat Important	1	4	33
Not Important	0		9
I don't know	2	1	1
How important are the following attributes when recruiting PhD qualified staff in your industry? (Respondents: identified as potential employers of PhD qualified individuals)
	Ability to think critically and problem solve	Capacity and ability to work autonomously	Specialist knowledge
Essential	98	74	38
Very Important	35	55	39
Somewhat Important	11	13	57
Not Important	0	1	11
I don't know	1	1	0
Should PhD training incorporate additional training to target key skills shortages in the workforce?
	Yes	No	It depends	I don't know
PhD Student	366	92	281	183
Research Group Leader (academic)	167	228	271	84
Postdoctoral Researcher (Academic)	110	43	78	46
Staff Scientist (academic)	33	11	32	11
Other (research in academic sector)	89	20	78	34
University Administrator	29	6	24	14
Researcher in Industry	14	6	7	3
Researcher in Clinical, non-academic setting	10		7	3
Other (research in non-academic setting)	27	5	11	3
Clinician and other health professions (non research active)	12	1	10	7
Other (non-research active)	107	26	70	34
Total	964	438	869*	422
* Answers explaining the choice for "It Depends" included recognition that not all PhD students continue in research and dependent on the individal and the areas or skills identified.
How do you/did you find the number of training courses/modules that students are required to attend during their PhD training?
	I found it too high	It was about right	I found it too low	It does not apply
PhD Student	106	416	231	167
Research Group Leader (academic)	160	397	83	107
Postdoctoral Researcher (Academic)	22	129	72	53
Other (research in academic sector)	13	66	39	104
Total	301	1008	425	431
How do you/did you find the number of training courses/modules that students are required to attend during their PhD training? (Respondents: Current PhD students, split by funding source)
PhD Student	I found it too high	It was about right	I found it too low	It does not apply
Wellcome Trust	29	145	62	43
Other (please state)	18	58	43	33
Medical Research Council (MRC)	10	36	22	8
University	6	34	30	24
Engineering and Physical Sciences Research Council (EPSRC)	4	19	4	1
Biotechnology and Biological Sciences Research Council (BBSRC)	8	15	8	3
National Institute for Health Research (NIHR)	2	7	3	4
British Heart Foundation (BHF)		5		2
Self-Funded	1	5	7	6
Cancer Research UK (CRUK)	1	3	3	2
How important is it for students to acquire the following skills?
	Commercial acumen, translational and entrepreneurial skills	Data, statistical and analytical skills	Leadership skills	Presentation and communication skills	Problem solving skills	Project management	Public engagement	Team working	Time management
PhD Student	848	909	908	912	912	911	908	907	913
Not important	254	8	56	2	3	5	82	22	1
Somewhat important	456	116	490	94	36	158	509	234	81
Very important	138	785	362	816	873	748	317	651	831
Research Group Leader (Academic)	723	745	740	746	745	746	743	744	745
Not important	301	2	62	0	0	16	103	8	4
Somewhat important	384	51	476	93	23	270	510	200	85
Very important	38	692	202	653	722	460	130	536	656
Postdoctoral Researcher (Academic)	252	274	272	273	274	273	272	272	274
Not important	79	0	16	1	2	3	30	7	3
Somewhat important	147	21	157	30	8	65	171	73	29
Very important	26	253	99	242	264	205	71	192	242
Staff Scientist (academic)	75	86	86	87	87	84	84	87	85
Not important	16	0	1	0	0	0	7	0	0
Somewhat important	43	8	45	11	1	31	55	25	12
Very important	16	78	40	76	86	53	22	62	73
Other (research in academic sector)	208	219	216	219	219	218	219	218	217
Not important	46	2	9	1	1	1	6	6	1
Somewhat important	114	29	122	30	9	61	124	49	20
Very important	48	188	85	188	209	156	89	163	196
University Administrator	72	73	73	73	73	73	73	71	73
Not important	13	1	1	1	1	1	1	1	1
Somewhat important	41	16	38	7	3	20	46	12	7
Very important	18	56	34	65	69	52	26	58	65
Researcher in Industry	29	30	29	30	29	30	29	29	29
Not important	6	0	3	0	0	1	9	0	0
Somewhat important	15	7	14	10	3	12	14	9	5
Very important	8	23	12	20	26	17	6	20	24
Clinician and other health professions (non-research active)	29	30	30	30	30	30	28	30	29
Not important	5	0	3	0	0	1	2	0	1
Somewhat important	19	1	12	3	1	8	15	7	1
Very important	5	29	15	27	29	21	11	23	27
Researcher in Clinical (non-academic setting)	20	20	20	20	20	20	20	20	20
Not important	2	0	0	0	0	0	0	0	0
Somewhat important	12	2	4	1	1	4	10	3	4
Very important	6	18	16	19	19	16	10	17	16
Other (research in non-academic setting)	44	46	45	44	45	46	46	45	45
Not important	3	0	3	0	0	1	4	0	0
Somewhat important	29	5	24	3	3	17	20	8	7
Very important	12	41	18	41	42	28	22	37	38
Other (non-research active)	225	234	232	234	235	235	229	233	235
Not important	36	5	11	0	0	5	16	1	1
Somewhat important	131	37	126	23	8	60	137	48	31
Very important	58	192	95	211	227	170	76	184	203
How important is it for students to acquire the following skills? (same as above but different groups for comparison)
	Commercial acumen, translational and entrepreneurial skills	Data, statistical and analytical skills	Leadership skills	Presentation and communication skills	Problem solving skills	Project management	Public engagement	Team working	Time management
PhD Student	848	909	908	912	912	911	908	907	913
Not important	254	8	56	2	3	5	82	22	1
Somewhat important	456	116	490	94	36	158	509	234	81
Very important	138	785	362	816	873	748	317	651	831
PhD Supervisor (not all group leaders are supervisors)	680	703	697	703	702	703	700	702	702
Not important	290	2	60	0	0	14	100	8	4
Somewhat important	360	49	452	89	22	262	484	192	82
Very important	30	652	185	614	680	427	116	502	616
Potential Employer of PhD graduates (outside of Academic Sector)	174	182	180	180	182	181	179	180	182
Not important	29	1	6	0	0	4	17	0	0
Somewhat important	99	34	98	22	10	50	99	34	26
Very important	46	147	76	158	172	127	63	146	156
As a potential employer of PhD graduates, are there any skills you feel they often lack? (Select all that apply; Respondents: individuals outside of research who identified as potential employers)
Commercial acumen, translational and entrepreneurial skills	78
Leadership skills	67
Team working	64
Project management	63
Presentation and communication skills	57
Time management	47
Public engagement	46
Data, statistical and analytical skills	26
Other**	23
Problem solving skills	17
** Answers under "Other" skills lacking varied and included: ability to deal with stress and heavy workloads, ability to present to a general audience, interpersonal skills and social awareness, ability to deal with methods outside of their own and modesty.

## Sheet: Support & Mental Health
If you could change ONE thing about the way that PhD students are currently trained, what would that be? (Respondents: PhD Students and PhD qualified individuals)
The most common answers are:
	Changes in length of training - Increase in length or continued funding post submission	285
	Increase opportunities for transferable skills training and for exploring careers outside of academic research	216
	Improve supervision & clearer outlining of expectations	78
	Computational analysis and statistics training	71
	Total number of respondents	1939
Main Challenges faced during PhD training (not directly related to the research project) - Most common answers + 2 that may be of interest. (Respondents: PhD Students and PhD qualified individuals. Total number of respondents 1837.)
	Inadequate/Unsatisfactory Supervision	225
	Work/Life Balance	156
	Personal Finances	133
	Mental Health	75
	Balancing Clinical Career	75
	Time Management	65
	Maintaining Motivation	60
	Time Constraints	59
	Bullying	6
	Sexual Harassment	5
In which areas could support for PhD students by either the institution or the supervisor be improved? (Select all that apply) (Respondents PhD Students and individuals undertaking research in an academic sector or are university administrators)
		PhD Students	Supervisors (GLs)	Postdoc/Staff Scientist
	Co-supervision from early career researchers	426	282	191
	Clearer outlining of what is expected from PhD students by supervisors and the institution	425	320	155
	Mental health/pastoral support/career counselling	440	329	183
	Networking with others across the institution to share best practice	452	285	155
	Provision of career advice	425	327	191
	Specific skills training	471	304	152
	Other(s)	75	98	38
Have you noticed any recent changes in the number of cases of mental health issues in PhD students? (Respondents: PhD Supervisors only)
	I have not noticed any change	397
	The number of cases apprears to have increased	321
	The number of cases appears to have decreased	4
	Total	722
What kind of support would be useful to address the increase in the number of cases? (Respondents: PhD Supervisors who answered having noticed an increase in the number of cases)
	Better access to counselling/Mental Health Support	102
	Clearer understanding of expectations and where to find support if needed	34
	Change in research culture/practice	21
	Better training for supervisors	20
	Don't know/Don't think there is increase/Not a problem for PhD specifically	20
	Peer support systems	16
	Nothing, my institution has very good support	12
	Other	11
	Pastoral care and supervision & open recognition and discussion	10
	Financial support and flexibilty return to work	10
	Better evaluation of admissions process	8
	Students need to engage	3
	Total	267

[truncated: 5 more sheets: Institutional Support, Discrimination, Work-Life Balance, Motivations + Next Destinations, Prospective Students]
